# Supplementary material for: IFITM3 Clusters on Virus Containing Endosomes and Lysosomes Early in the Influenza A Infection of Human Airway Epithelial Cells
Source: PubMed Central journal article supplement (PMC6631848; doi:10.3390/v11060548), 2019-06-12
Supplement: viruses-11-00548-s001.pdf [file viruses-11-00548-s001.pdf]

Figure S1

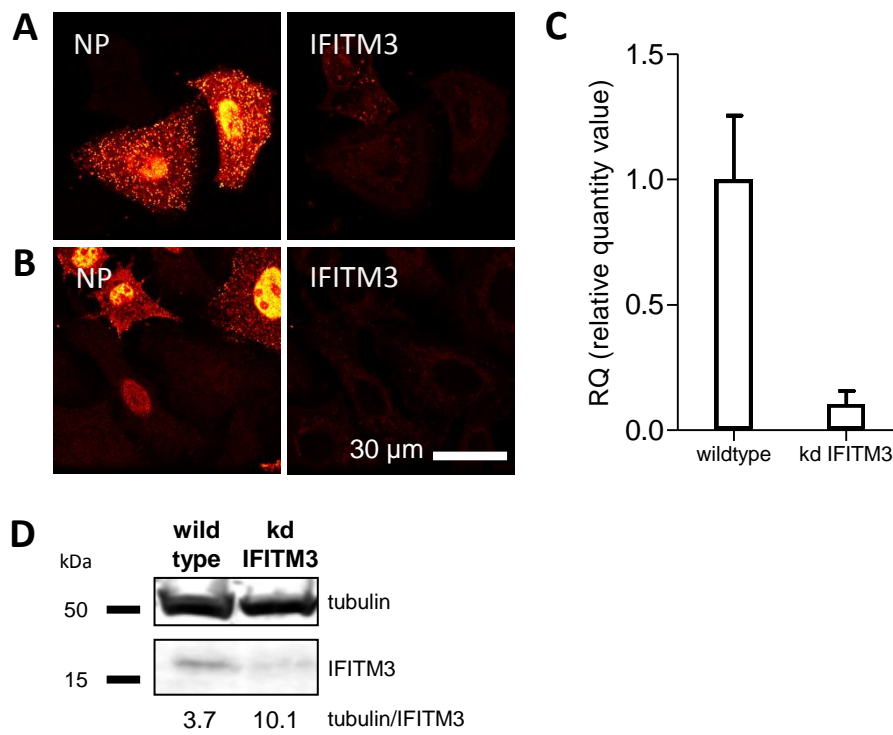

Figure S2

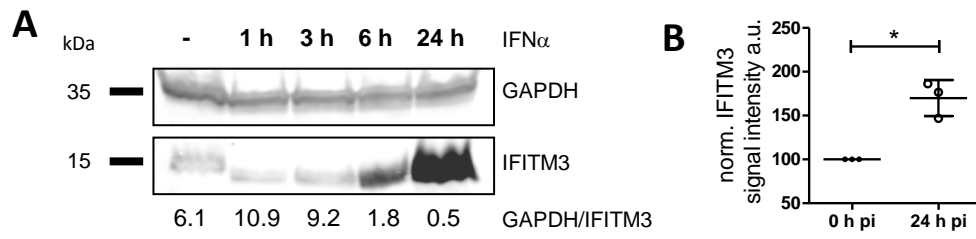

Figure S3

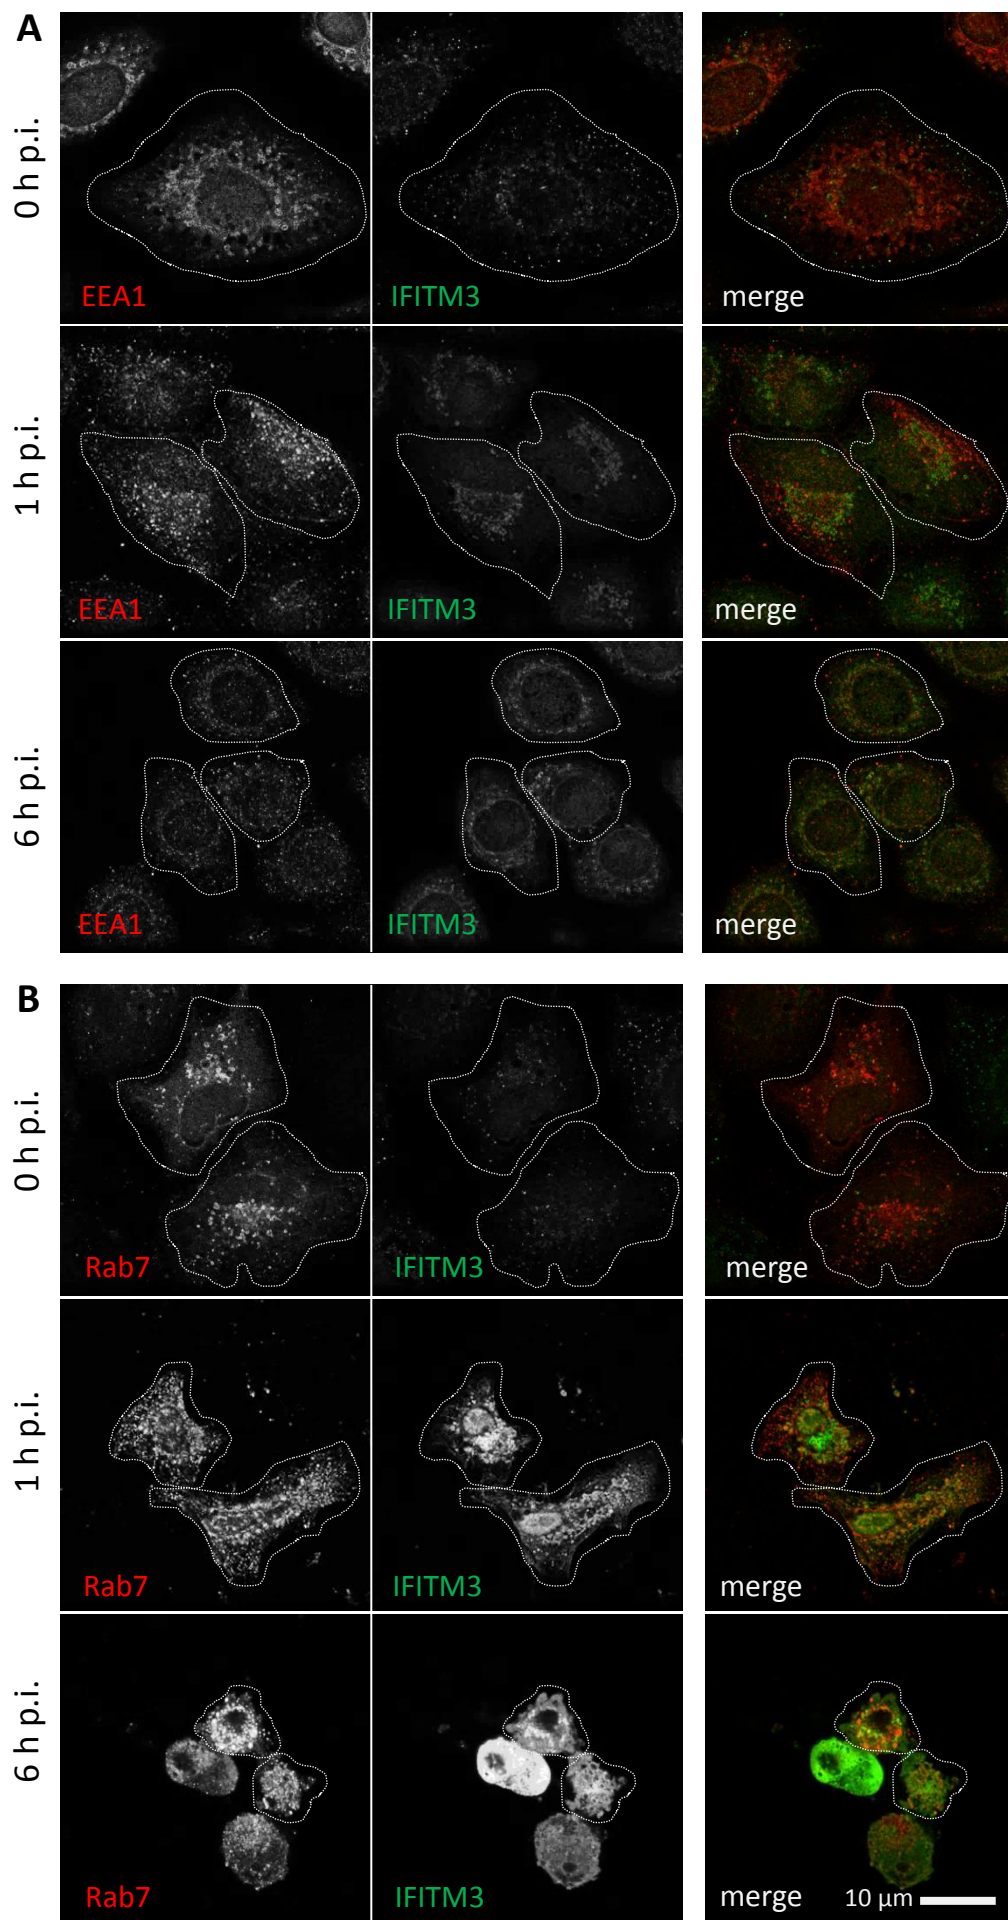

Figure S3

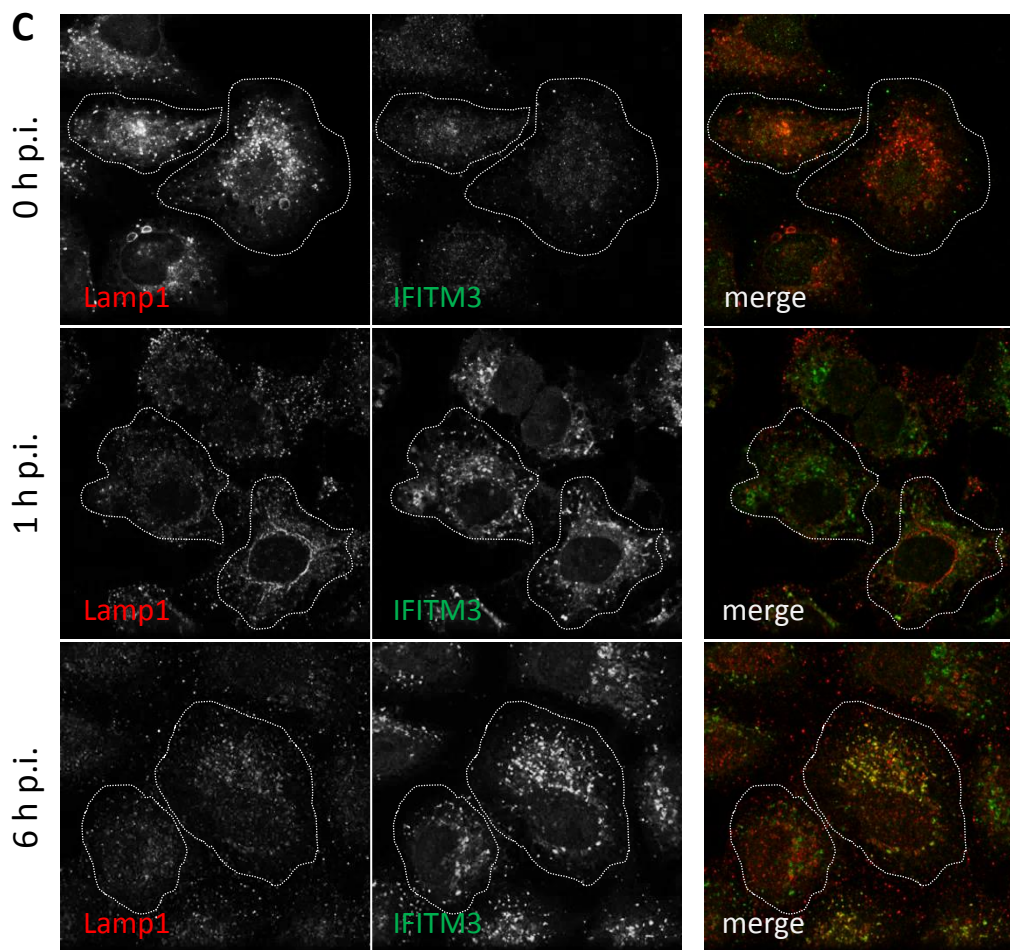

Figure S4

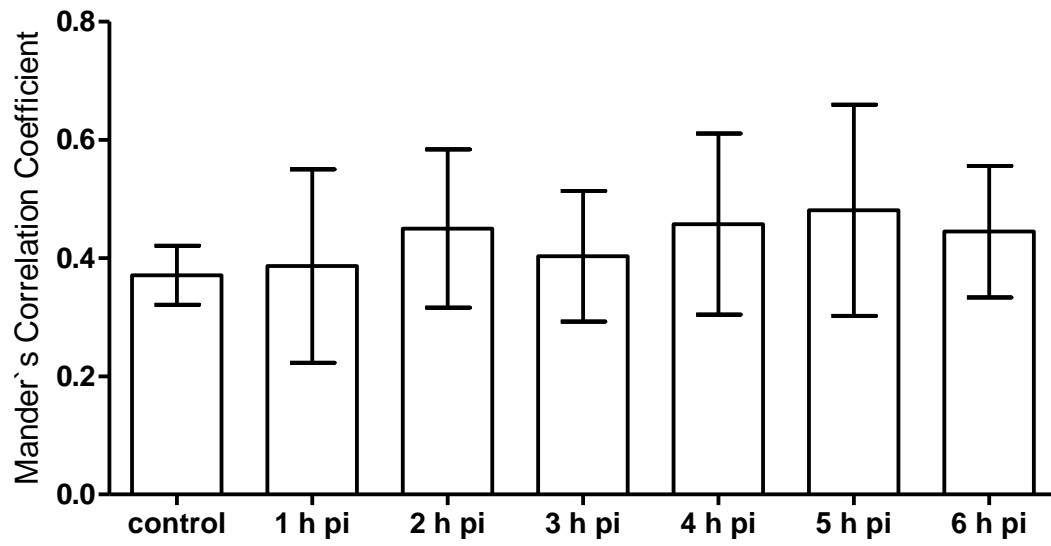

Figure S5

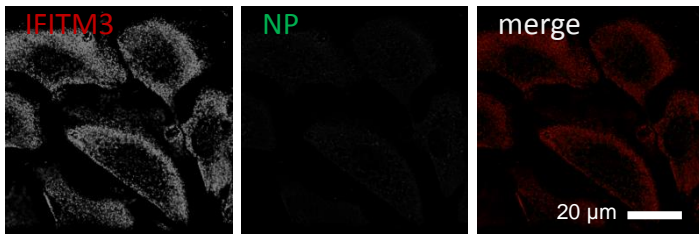

1 Supplementary figure legends

2 Figure S1. CRISPR/Cas mediated knock-down of IFITM3 in A549 results in decreased levels of IFITM3  
3 protein. A549 wildtype **(A)** and IFITM3 knock-down **(B)** cells subjected for immunofluorescence were  
4 infected with IAV A/Hong Kong/1/1968 (MOI = 1) and fixed at 8 h pi. Cells were stained for IFITM3 and  
5 anti-nucleoprotein (NP). Images show representations of productively infected (NP signals inside the  
6 nucleus) and non-infected (no NP signals) A549 cells. Image acquisition was performed using 60 nm (=   
7 confocal mode) pixel size. **(C)** Quantitative Real-time PCR with IFITM3 specific primer sets validated  
8 knock-down in A549 cells. **(D)** Immunoblot analysis of IFITM3 levels in whole-cell lysates from A549  
9 wildtype and IFITM3 knock-down cells. Tubulin was used as loading control. Panels are derived from a  
10 single cropped blot with lanes 1 and 2 belonging to the same membrane and from the same experiment.

11  
12 Figure S2. IFITM3 abundance increases upon hIFN $\alpha$  induction and IAV infection at 24 h pi in A549 cells.  
13 **(A)** IFITM3 abundance in the absence and presence of 100 U/ml hIFN $\alpha$  for the indicated times was  
14 determined by western blotting. GAPDH level was used as loading control. The relative expression of  
15 IFITM3 was calculated as ration between the GAPDH and IFITM3 signals. Panels are derived from the  
16 same cropped blots with all lanes belonging to a single membrane and coming from the same  
17 experiment. Signal intensities were determined using the Li-Cor Odyssey Software. **(B)** Quantitative  
18 analysis of signal intensities of IFITM3 levels based on immunoblots of whole-cell lysates from non-  
19 infected (0 h pi) and A/Hong Kong/1/1968 infected (24 h pi) A549 wildtype cells. Tubulin was used as  
20 loading control. Mean values of three independent experiments are plotted as mean (SD).

21  
22 Figure S3. IFITM3 proteins cover early, late and recycling endosomes at distinct time points post  
23 infection. Indirect immunofluorescence analysis using anti-IFITM3 antibody (green) in combination with

24 **(A)** anti-EEA1 antibody (red,), **(B)** anti-Rab7 antibody (red) and **(C)** anti-Lamp1 antibody (red). A549 cells  
25 subjected for fluorescence microscopy were infected with IAV A/Hong Kong/1/1968 (MOI = 1) and fixed  
26 with ice cold methanol at **(i)** 0 h pi (control), **(ii)** 1 h pi, and **(iii)** 6 h pi. Images shown represent the major  
27 subcellular distribution of each protein. The periphery of the immunostained cells was outlined with  
28 white dot lines on the basis of the cell morphology. Image acquisition was performed using 60 nm (=   
29 confocal mode) pixel size.

30  
31 Figure S4. IFITM3 abundance stays constant in recycling endosomes up to 6 h pi in IAV infected A549  
32 cells. Signal intensities for IFITM3 were correlated to the recycling endosomal marker, Rab11. Mander`s  
33 Correlation Coefficients from three independent experiments for each condition were calculated using  
34 the coloc2 plugin implemented in Fiji software. Mean values are plotted as mean (SD).

35  
36 Figure S5. Indirect immunofluorescence analysis of naïve human small airway epithelial cells (HSAEpCs)  
37 using anti-IFITM3 (red) and anti-NP (green). Image acquisition was performed using 60 nm pixel size.

38
